# Supplementary material for: Nb2O5 nanoparticles encapsulated in ordered mesoporous carbon matrix as advanced anode materials for Li ion capacitors
Source: Royal Society of Chemistry journal article supplement (doi:10.1039/c6ra11460a), 2016-01-01
Supplement: c6ra11460a1.pdf [file c6ra11460a1.pdf]

**Nb<sub>2</sub>O<sub>5</sub> nanoparticles encapsulated into ordered mesoporous carbon matrix as  
advanced anode materials for Li ion capacitors**

Jingjie Wang, Hongsen Li, Laifa Shen, Shengyang Dong, and Xiaogang Zhang\*

Jiangsu Key Laboratory of Materials and Technology for Energy Conversion, College of Material  
Science & Engineering, Nanjing University of Aeronautics and Astronautics, Nanjing, 210016, P.R.

China. Email: [azhangxg@nuaa.edu.cn](mailto:azhangxg@nuaa.edu.cn)

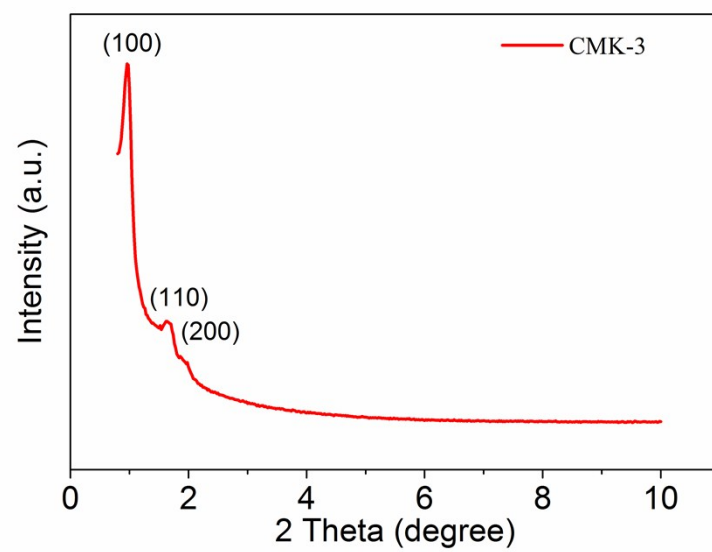

**Fig. S1** Small angle X-ray diffraction (SAXRD) patterns of the CMK-3 carbon template.

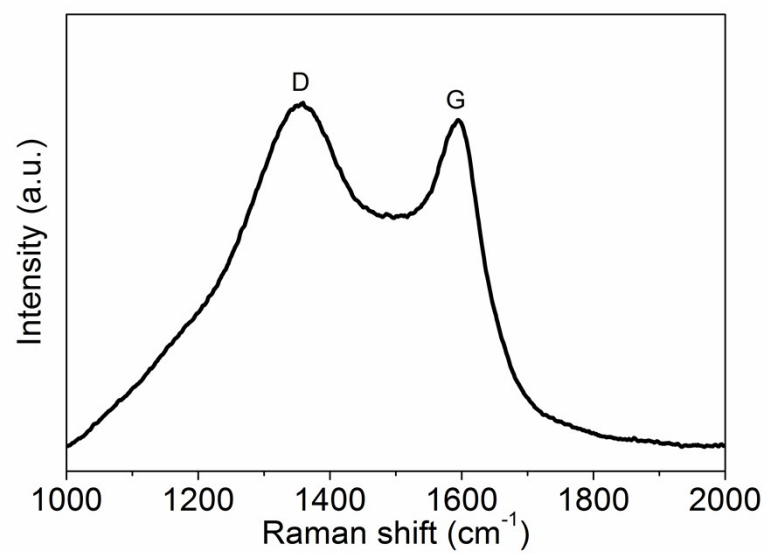

**Fig. S2** Raman spectrum of the original CMK-3 carbon template.

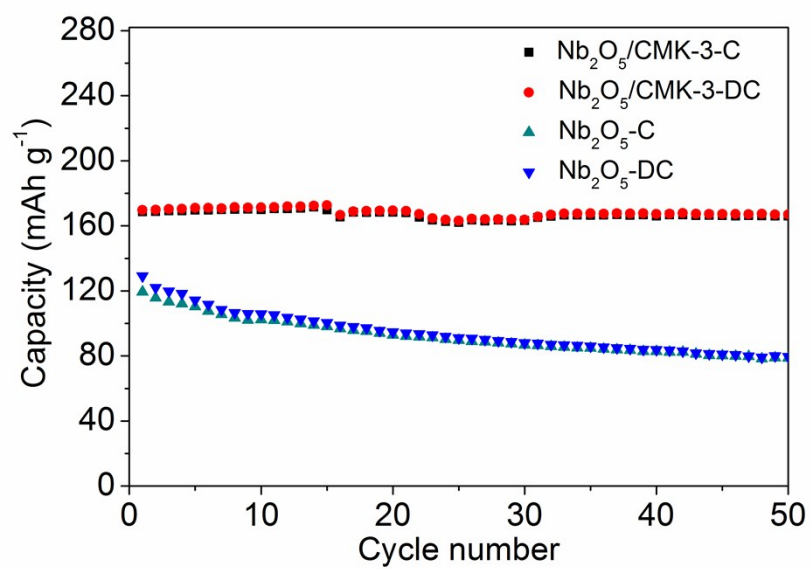

**Fig. S3** Cycle performances of bulk  $\text{Nb}_2\text{O}_5$  and  $\text{Nb}_2\text{O}_5/\text{CMK-3}$  nanocomposite at 1 C.

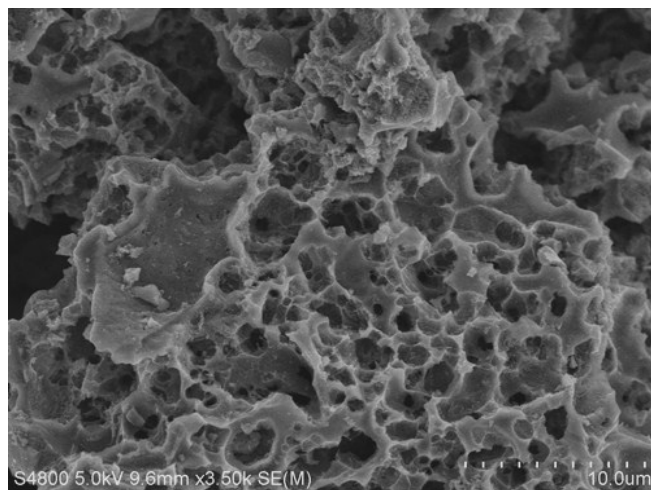

**Fig. S4** SEM image of Peanut shell carbon (PSC).

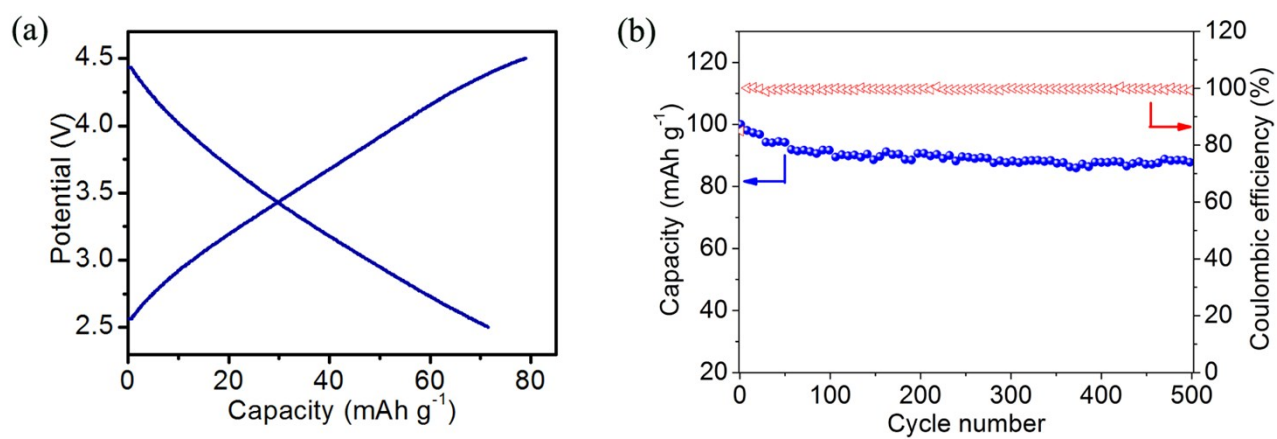

**Fig. S5** a) galvanostatic charge-discharge curve of PSC at 0.2 C. b) Cycle performance and coulombic efficiency of PSC at 0.1 C.

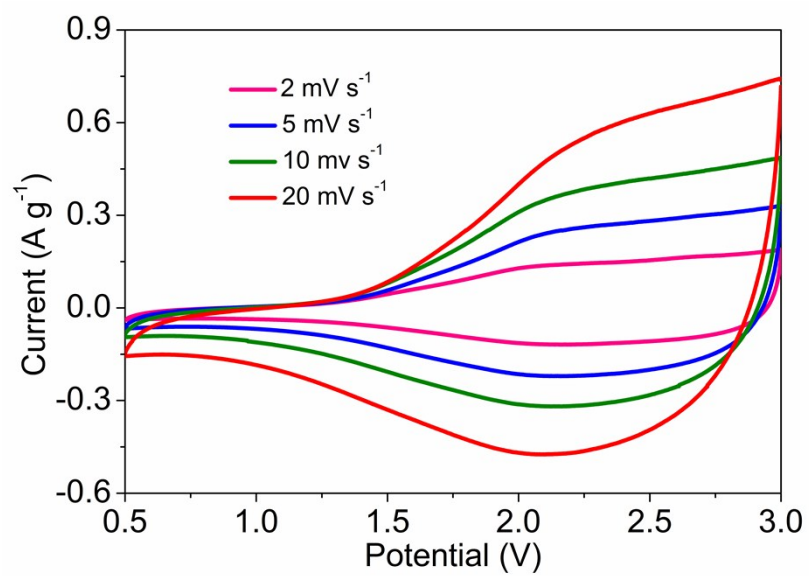

**Fig. S6** The cyclic voltammetry curves of the Nb<sub>2</sub>O<sub>5</sub>/CMK-3//PSC hybrid device.
